# Supplementary material for: The structure and stability of reduced and oxidized mononuclear platinum species on nanostructured ceria from density functional modeling
Source: Royal Society of Chemistry journal article supplement (doi:10.1039/c5cp01685a), 2015-01-01
Supplement: c5cp01685a1.pdf [file c5cp01685a1.pdf]

## Electronic Supplementary Information

### Structure and stability of reduced and oxidized mononuclear platinum species on nanostructured ceria from density functional modeling

Hristiyan A. Aleksandrov,<sup>1,2</sup> Konstantin M. Neyman,<sup>2,3</sup> and Georgi N. Vayssilov<sup>1\*</sup>

<sup>1</sup> Faculty of Chemistry and Pharmacy, University of Sofia, 1126 Sofia, Bulgaria

e-mail: gnv@chem.uni-sofia.bg

<sup>2</sup> Departament de Química Física & Institut de Química Teòrica i Computacional (IQTC-UB), Universitat de Barcelona, 08028 Barcelona, Spain

<sup>3</sup> Institució Catalana de Recerca i Estudis Avançats (ICREA), 08010 Barcelona, Spain

e-mail: konstantin.neyman@icrea.cat

#### Content

1. Figure S1: calculated Pt 4f core levels of platinum species (with respect to the Fermi level) in eV versus the number of Pt-O contacts or the sum of reciprocal squares of Pt-O distances.
2. Figure S2: concentration of different complexes as function of  $P(O_2)$  obtained from the thermodynamic models for the various modeled series  $PtO_X/Ce_{21}O_{42-Y}$  ( $X, Y = 0 \div 2$ ) and for the pure  $Ce_{21}O_{42}$  at 300, 800, and at 1200 K.

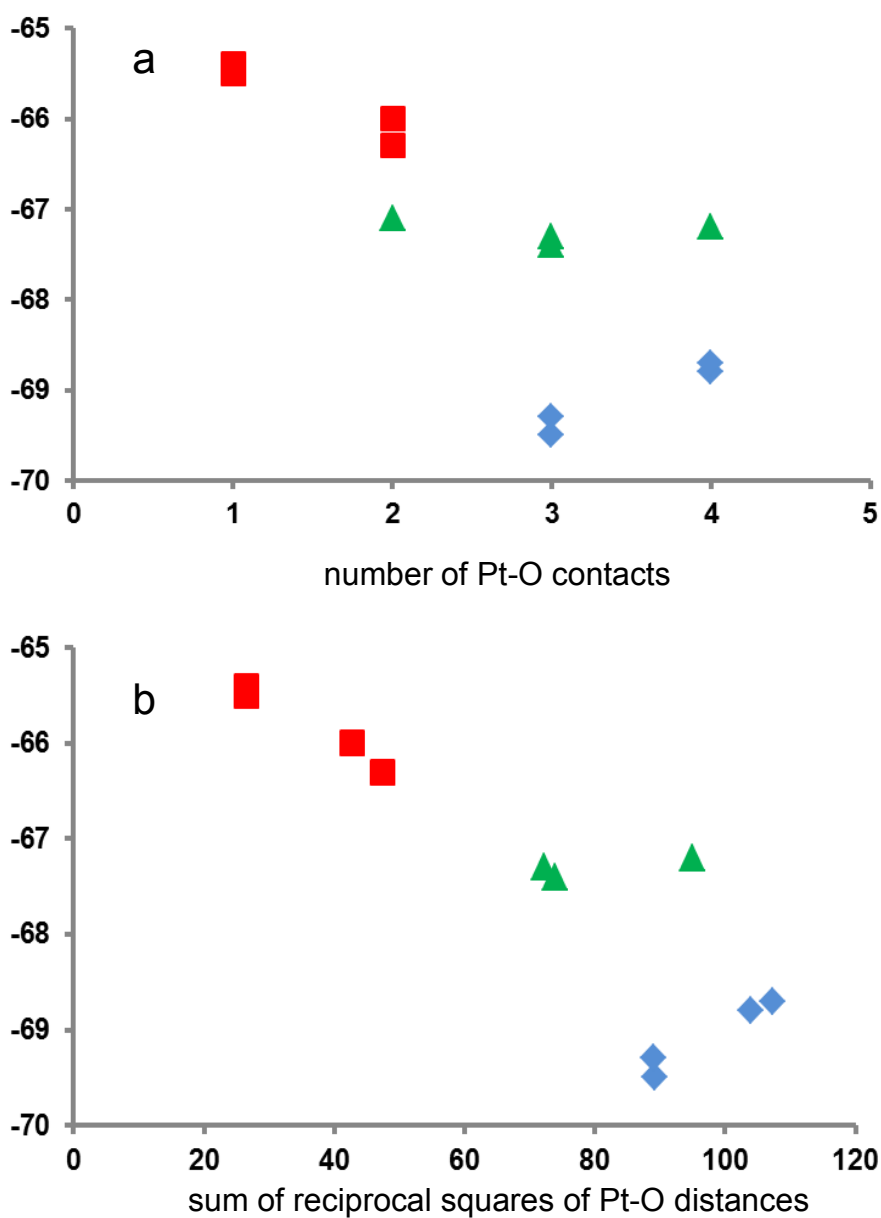

**Figure S1**

Calculated Pt 4f core level energies of platinum species (with respect to the Fermi level in the system) in eV versus (a) the number of Pt-O contacts or (b) the sum of reciprocal squares of Pt-O distances (in pm<sup>-2</sup> multiplied by 10<sup>6</sup>): species corresponding to Pt<sup>0</sup> (red squares), to Pt<sup>2+</sup> (green triangles) and Pt<sup>4+</sup> (blue rhombus).

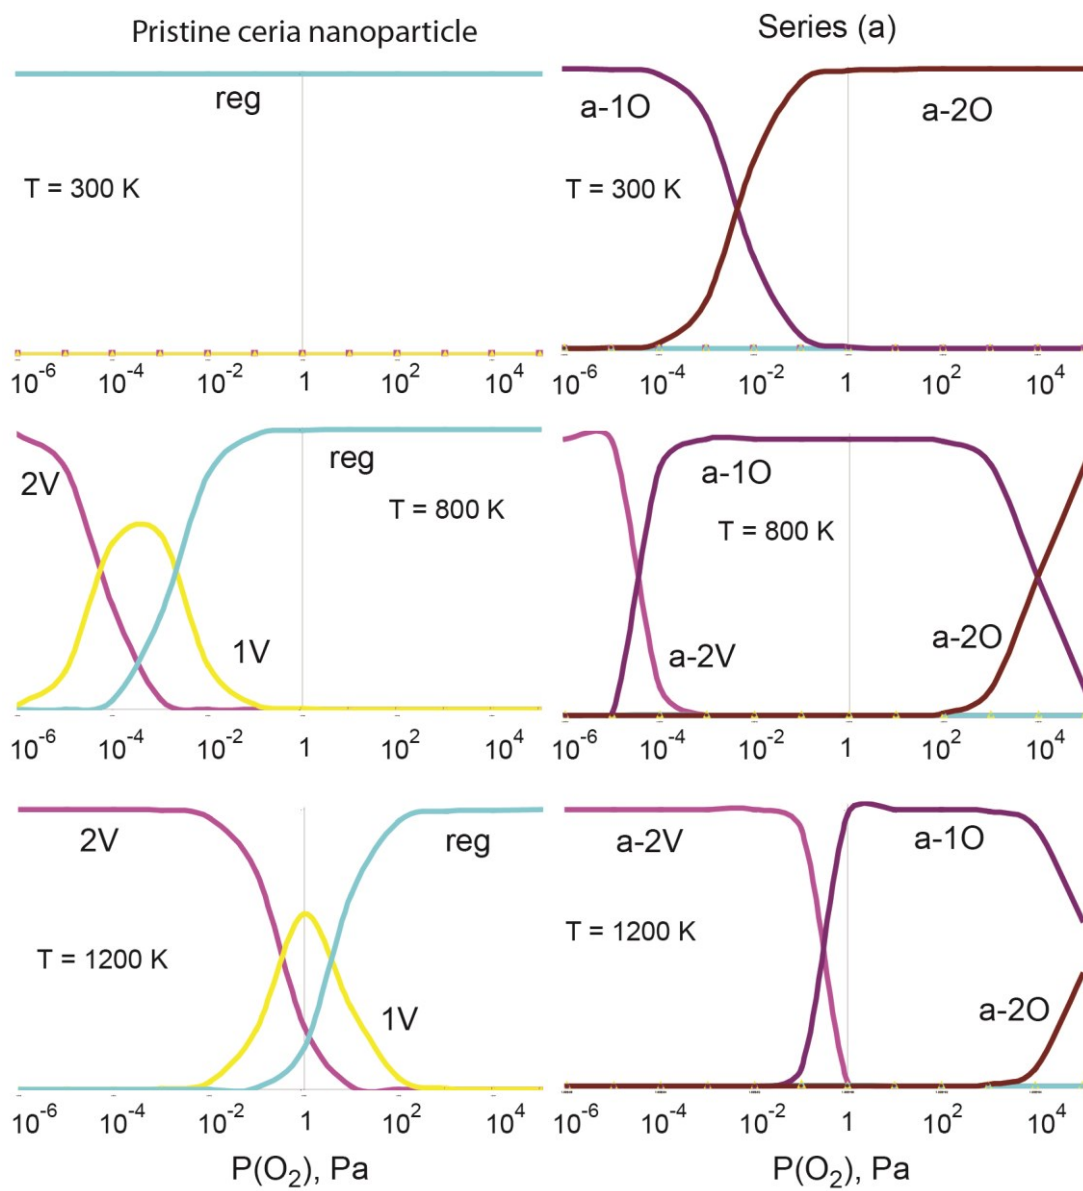

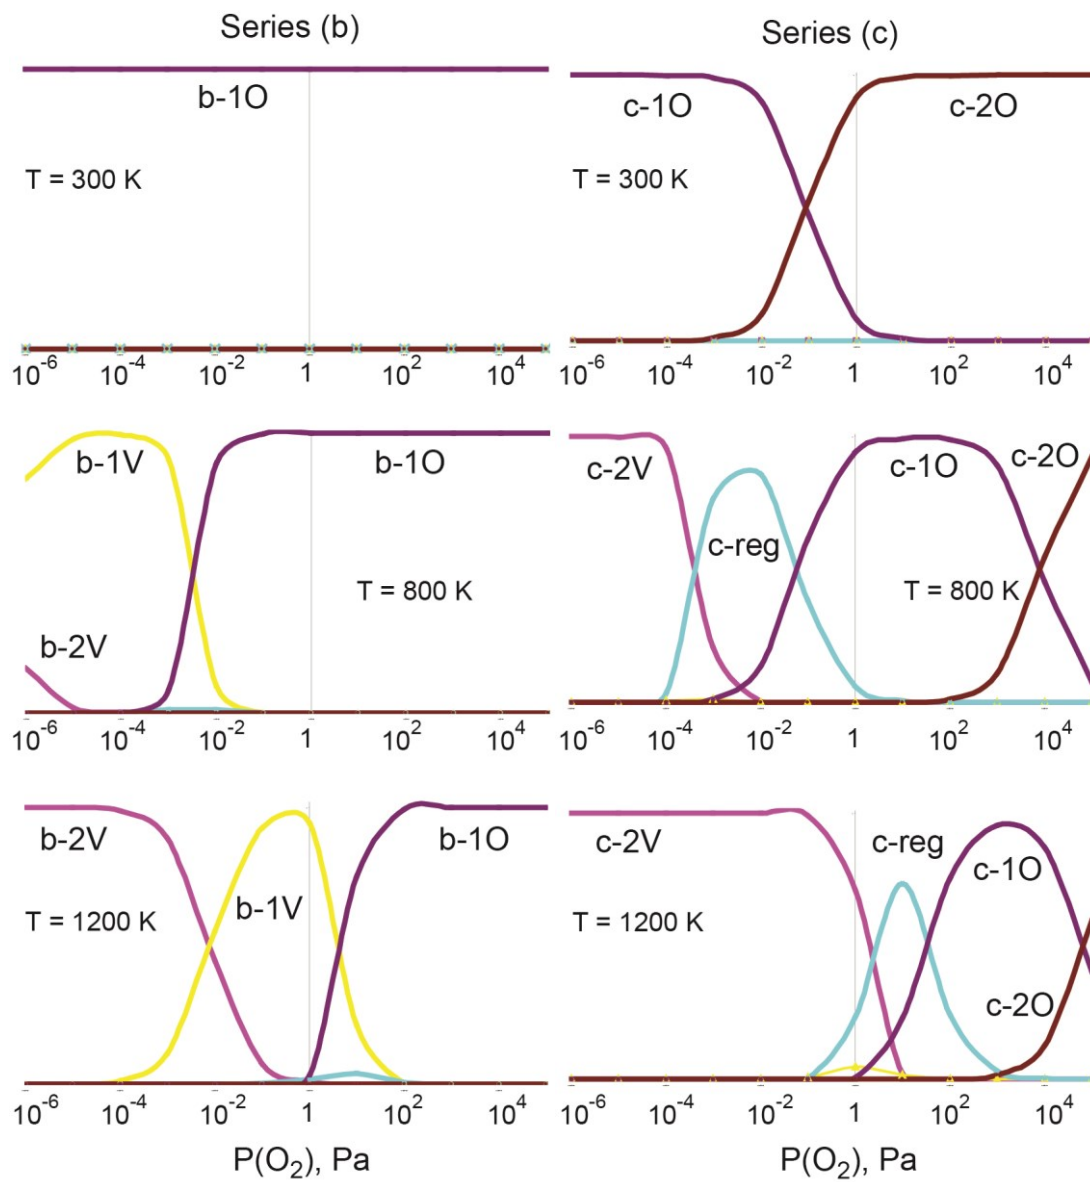

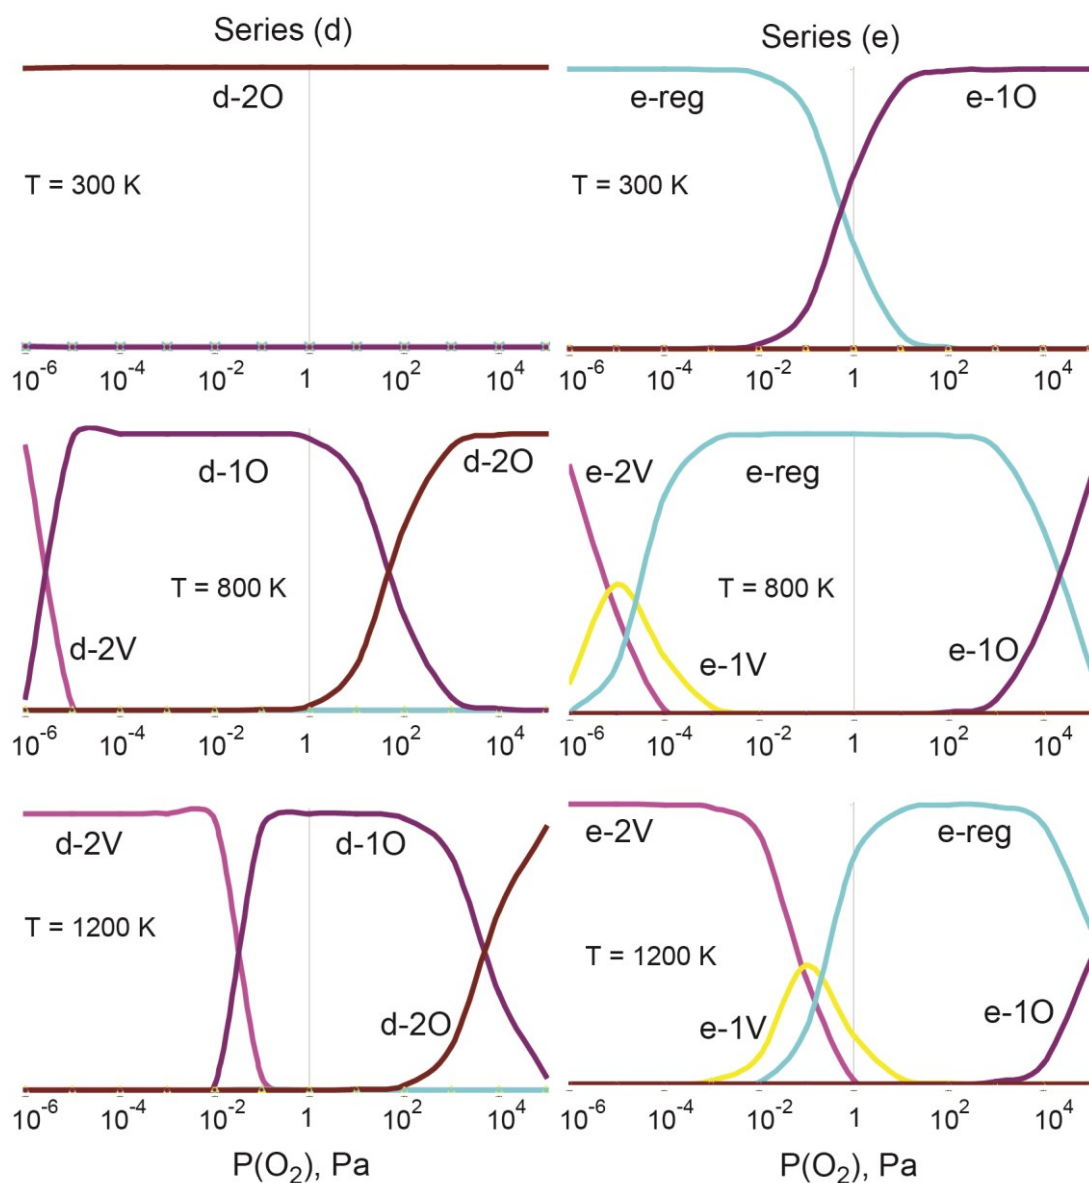

**Figure S2**

Concentration of various complexes as function of  $P(O_2)$  obtained thermodynamic models for the various series  $PtO_X/Ce_{21}O_{42-Y}$  ( $X, Y = 0 \div 2$ ): for  $Y = 0 - 2$  and  $X = 0$  and  $1$  and on the pristine  $Ce_{21}O_{42}$  at three different temperatures, 300, 800 and 1200 K. The vertical axis corresponds to the relative concentration of the species ranging from 0 to 100%.
